# Supplementary material
Source: MDPI journal article supplement (https://www.mdpi.com/2073-4352/11/5/508)
Supplement: s1 [file s1]

# Crystal Structure, Topological and Hirshfeld Surface Analysis of a Zn(II) Zwitterionic Schiff base Complex Exhibiting Non-linear Optical (NLO) Properties Using Z-Scan Technique

Saima Kamaal <sup>1</sup>, Mohd Mehkoom <sup>2</sup>, Mohd Muslim <sup>1</sup>, Syed Mohammad Afzal <sup>2</sup>, Abdullah Alarifi <sup>3</sup>, Mohd Afzal <sup>3</sup>, Ahmad Alowais <sup>3</sup>, Mohd Muddassir <sup>3,\*</sup>, Awad Naseer Albalwi <sup>3</sup> and Musheer Ahmad <sup>1,\*</sup>

<sup>1</sup> Department of Applied Chemistry, ZHCET, Faculty of Engineering and Technology, Aligarh Muslim University, Aligarh UP-202002, India; saimakamaal786@gmail.com (S.K.); mohammadmuslim1996@gmail.com (M.M.)

<sup>2</sup> Department of Physics, Aligarh Muslim University, Aligarh UP-202002, India; mehkoom@outlook.com (M.M.); drsmafzal62@gmail.com (S.M.A.)

<sup>3</sup> Department of Chemistry, College of Science, King Saud University, Riyadh 11451, Saudi Arabia; arifi@ksu.edu.sa (A.A.); maslam1@ksu.edu.sa (M.A.); alowais@ksu.edu.sa (A.A.); awad\_albalwi@hotmail.com (A.N.A.)

\* Correspondence: mmohammadarshad@ksu.edu.sa (M.M.); amusheer4@gmail.com (M.A.)

## Single crystal X-ray studies

Good quality single crystal of complex **1** were selected and mounted on a 'Bruker APEX-II CCD' diffractometer. The crystal was kept at 100(2) K during data collection using Mo K $\alpha$  radiation at  $\lambda = 0.71073$  Å. Crystal structure was determined by using Olex-2 [1], the structure was solved with the olex-2.solve [2] structure solution program using Charge Flipping and refined with the olex-2.refine refinement package [2] using Gauss-Newton minimisation. All non-hydrogen atoms were refined with anisotropic displacement parameter.

## Topological analysis

The analysis was performed with the topcryst.com [3]. The RCSR three-letter codes [4] were used to designate the network topologies. Those nets, that are absent in the RCSR, are designated with the TOPOS ND<sub>n</sub> nomenclature [5], where N is a sequence of coordination numbers of all non-equivalent nodes of the net, D is periodicity of the net (D=M, C, L, T for 0-,1-,2-,3-periodic nets), and n is the ordinal number of the net in the set of all non-isomorphic nets with the given ND sequence. To calculate the underlying nets, we used algorithms, the application of which for specific structures of complex **1** [6]. The TTD collection [7] was used to determine the topological type of the crystal structure.

## Hirshfeld surface analysis

Hirshfeld surface associated with 2D finger plot were generated using Crystal information file (CIF), imported in the Crystal Explorer version 3.1 [8]. Hirshfeld surface analysis is a unique tool for the quantitative information of intermolecular interaction within crystal structure packing. Hirshfeld surface represented by the 2D finger plot relative to their particular contribution of different intermolecular interaction present in the crystal structure. Structural Surface are mapped over the  $d_{\text{norm}}$ , shape index and curvedness, a view of red color scale shows (shorter distance than van der Waals radii from nucleus), white (equal to van der Waals separation radii) and blue color represent a longer distance than van der Waals radii from nuclei) [9–11]. The decomposed finger plot has been shown in term of  $d_e$  is the external distance to the nearest nucleus to the surface and  $d_i$  is the internal distance to the nearest nucleus to the surface ( $d_e > d_i$ , upper case spike shows donor system,  $d_e < d_i$  lower case spike represent acceptor system) [10].

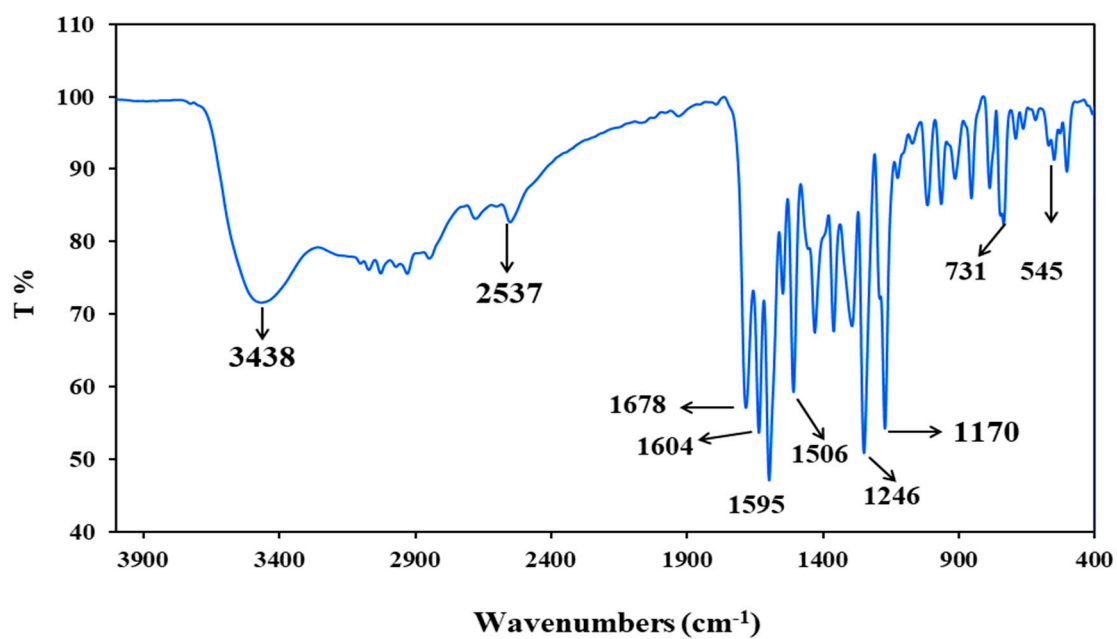

Figure 1. FTIR spectrum of complex 1.

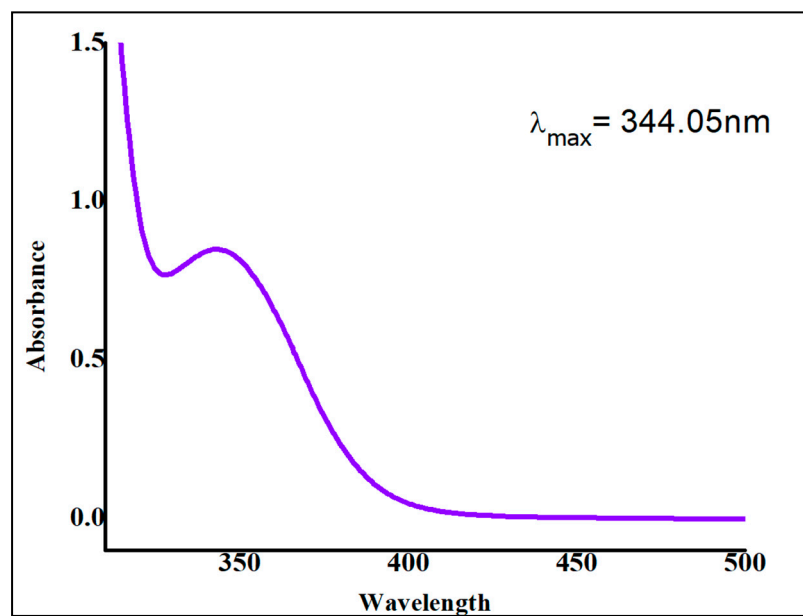

Figure 2. UV-visible spectrum of complex 1.

**Table 1.** Selected Bond Lengths (Å) and Angles (deg) for complex 1.

| Bond Lengths (Å) |      |           |      |      |           |
|------------------|------|-----------|------|------|-----------|
| Atom             | Atom | Length/Å  | Atom | Atom | Length/Å  |
| Zn1              | Cl1  | 2.258(4)  | C2   | C7   | 1.425(17) |
| Zn1              | Cl2  | 2.210(4)  | C3   | C4   | 1.399(18) |
| Zn1              | O1   | 1.990(8)  | C4   | C5   | 1.377(17) |
| Zn1              | O5   | 2.120(10) | C5   | C6   | 1.403(17) |
| Zn1              | O2   | 2.407(8)  | C6   | C7   | 1.422(17) |
| O1               | C7   | 1.312(13) | C6   | C8   | 1.417(17) |
| O2               | C1   | 1.401(16) | C9   | C10  | 1.396(16) |
| O2               | C2   | 1.349(15) | C9   | C14  | 1.387(16) |
| O3               | C15  | 1.242(15) | O4   | C15  | 1.274(15) |
| O5               | C16  | 1.52(2)   | C11  | C12  | 1.387(17) |
| N1               | C8   | 1.325(15) | C10  | C11  | 1.377(17) |
| C12              | C13  | 1.395(17) | N1   | C9   | 1.428(14) |
| C12              | C15  | 1.490(16) | C2   | C3   | 1.368(17) |
| C13              | C14  | 1.369(17) |      |      |           |

| Bond Angle (degree). |      |      |            |      |      |      |           |
|----------------------|------|------|------------|------|------|------|-----------|
| Atom                 | Atom | Atom | Angle/°    | Atom | Atom | Atom | Angle/°   |
| Cl2                  | Zn1  | Cl1  | 116.88(14) | C8   | C6   | C7   | 120.8(11) |
| O1                   | Zn1  | Cl1  | 123.0(3)   | C2   | C7   | O1   | 120.7(10) |
| O1                   | Zn1  | Cl2  | 118.5(3)   | C6   | C7   | O1   | 121.5(10) |
| O5                   | Zn1  | Cl1  | 96.1(3)    | C6   | C7   | C2   | 117.8(10) |
| O5                   | Zn1  | Cl2  | 98.7(3)    | C6   | C8   | N1   | 122.0(11) |
| O5                   | Zn1  | O1   | 88.0(4)    | C10  | C9   | N1   | 115.3(10) |
| C7                   | O1   | Zn1  | 122.7(7)   | C14  | C9   | N1   | 123.6(10) |
| C2                   | O2   | C1   | 119.8(10)  | C14  | C9   | C10  | 121.0(11) |
| C16                  | O5   | Zn1  | 127.4(9)   | C11  | C10  | C9   | 119.7(11) |
| C9                   | N1   | C8   | 127.7(10)  | C12  | C11  | C10  | 119.7(11) |
| C3                   | C2   | O2   | 126.8(11)  | C13  | C12  | C11  | 119.9(10) |
| C7                   | C2   | O2   | 113.1(10)  | C15  | C12  | C11  | 120.3(11) |
| C7                   | C2   | C3   | 120.1(11)  | C15  | C12  | C13  | 119.9(11) |
| C4                   | C3   | C2   | 121.4(11)  | C14  | C13  | C12  | 121.0(11) |
| C5                   | C4   | C3   | 120.4(11)  | C13  | C14  | C9   | 118.8(11) |
| C6                   | C5   | C4   | 119.4(12)  | O4   | C15  | O3   | 123.9(11) |
| C7                   | C6   | C5   | 121.0(11)  | C12  | C15  | O3   | 119.6(11) |
| C8                   | C6   | C5   | 118.3(11)  | C12  | C15  | O4   | 116.6(11) |

**Table S2.** Hydrogen Atom Coordinates ( $\text{\AA} \times 10^4$ ) and Isotropic Displacement Parameters ( $\text{\AA}^2 \times 10^3$ ) for complex 1.

| Atom | <i>x</i>   | <i>y</i> | <i>z</i>   | U(eq)    |
|------|------------|----------|------------|----------|
| H5   | 4580(160)  | 3870(50) | 3600(300)  | 40.1(11) |
| H1   | 8305(11)   | 3756(3)  | 5059(15)   | 19(3)    |
| H1a  | 6220(90)   | 2590(5)  | 11650(90)  | 41(5)    |
| H1b  | 6610(70)   | 3000(20) | 13200(20)  | 41(5)    |
| H1c  | 4990(30)   | 2960(20) | 11610(90)  | 41(5)    |
| H3   | 8856(14)   | 2700(4)  | 12588(18)  | 20(3)    |
| H4a  | 11298(14)  | 2701(4)  | 12180(20)  | 24(3)    |
| H5a  | 11892(14)  | 3060(4)  | 9286(18)   | 20(3)    |
| H8   | 11188(13)  | 3500(4)  | 6144(18)   | 19(3)    |
| H10  | 7272(13)   | 4156(4)  | 2125(19)   | 22(3)    |
| H11  | 7487(13)   | 4552(4)  | −900(19)   | 22(3)    |
| H13  | 11866(14)  | 4246(4)  | 340(20)    | 23(3)    |
| H14  | 11671(13)  | 3858(4)  | 3371(19)   | 21(3)    |
| H16a | 3930(90)   | 4592(6)  | 3560(120)  | 77(7)    |
| H16b | 4530(140)  | 4562(6)  | 6140(90)   | 77(7)    |
| H16c | 5680(50)   | 4587(6)  | 4600(200)  | 77(7)    |
| H4   | 11180(150) | 4850(50) | −4200(200) | 20(40)   |

**Table S3.** Fractional Atomic Coordinates ( $\times 10^4$ ) and Equivalent Isotropic Displacement Parameters ( $\text{\AA}^2 \times 10^3$ ) for sk1. U<sub>eq</sub> is defined as 1/3 of the trace of the orthogonalised U<sub>ij</sub> tensor.

| Atom | <i>x</i>   | <i>y</i>   | <i>z</i>  | U(eq)    |
|------|------------|------------|-----------|----------|
| Zn1  | 5165.1(16) | 3542.9(5)  | 7196(2)   | 21.1(4)  |
| Cl1  | 4422(4)    | 3973.4(12) | 9598(6)   | 32.1(9)  |
| Cl2  | 3619(4)    | 3026.3(11) | 5697(5)   | 26.8(8)  |
| O1   | 7257(9)    | 3519(3)    | 6905(13)  | 17.6(18) |
| O2   | 6556(9)    | 3119(3)    | 10160(14) | 24(2)    |
| O3   | 8724(10)   | 4847(3)    | −3716(13) | 21(2)    |
| O4   | 11124(10)  | 4678(3)    | −2945(15) | 22(2)    |
| O5   | 4718(11)   | 3988(3)    | 4599(14)  | 31(2)    |
| N1   | 9214(11)   | 3747(3)    | 4863(15)  | 15(2)    |
| C1   | 6057(15)   | 2900(5)    | 11780(20) | 27(3)    |
| C2   | 7985(14)   | 3079(4)    | 10037(19) | 18(3)    |
| C3   | 9087(14)   | 2856(4)    | 11426(18) | 16(3)    |
| C4   | 10547(14)  | 2852(4)    | 11170(20) | 20(3)    |
| C5   | 10903(14)  | 3067(4)    | 9469(18)  | 17(3)    |
| C6   | 9791(14)   | 3294(4)    | 8010(20)  | 17(3)    |
| C7   | 8306(12)   | 3307(4)    | 8262(17)  | 12(2)    |
| C8   | 10190(13)  | 3517(4)    | 6284(18)  | 16(2)    |
| C9   | 9462(13)   | 3981(4)    | 3050(18)  | 14(2)    |
| C10  | 8207(13)   | 4179(4)    | 1762(19)  | 18(3)    |
| C11  | 8331(13)   | 4409(4)    | −38(19)   | 19(3)    |
| C12  | 9692(14)   | 4431(4)    | −588(18)  | 15(3)    |
| C13  | 10933(14)  | 4227(4)    | 710(20)   | 19(3)    |
| C14  | 10826(13)  | 4000(4)    | 2509(19)  | 18(3)    |
| C15  | 9833(14)   | 4668(4)    | −2560(20) | 19(3)    |
| C16  | 4720(20)   | 4475(6)    | 4740(30)  | 51(5)    |

**Table S4.** Anisotropic Displacement Parameters ( $\text{\AA}^2 \times 10^3$ ) for sk1. The Anisotropic displacement factor exponent takes the form:  $-2\pi^2[h^2a^2U_{11}+2hka \times b \times U_{12}+\dots]$ .

| Atom | U <sub>11</sub> | U <sub>22</sub> | U <sub>33</sub> | U <sub>12</sub> | U <sub>13</sub> | U <sub>23</sub> |
|------|-----------------|-----------------|-----------------|-----------------|-----------------|-----------------|
| Zn1  | 17.9(8)         | 28.9(9)         | 16.8(7)         | 2.5(6)          | 4.6(6)          | 2.3(7)          |
| Cl1  | 30.7(19)        | 44(2)           | 24.7(17)        | 11.4(16)        | 12.8(14)        | −2.8(16)        |
| Cl2  | 20.5(16)        | 32.2(18)        | 25.5(17)        | −0.6(14)        | 1.4(13)         | −0.3(14)        |
| O1   | 15(4)           | 24(5)           | 14(4)           | −1(4)           | 5(3)            | 6(4)            |
| O2   | 13(4)           | 37(6)           | 23(5)           | −5(4)           | 8(4)            | −1(4)           |
| O3   | 23(5)           | 27(5)           | 10(4)           | −2(4)           | 1(4)            | 5(4)            |
| O4   | 21(5)           | 27(5)           | 19(5)           | 0(4)            | 10(4)           | 6(4)            |
| O5   | 39(6)           | 39(6)           | 12(5)           | 5(5)            | 1(4)            | 1(4)            |
| N1   | 13(5)           | 19(5)           | 14(5)           | −2(4)           | 2(4)            | 4(4)            |
| C1   | 21(7)           | 33(8)           | 30(8)           | 4(6)            | 13(6)           | 0(6)            |
| C2   | 23(7)           | 16(6)           | 14(6)           | −3(5)           | 3(5)            | −3(5)           |
| C3   | 30(7)           | 15(6)           | 5(5)            | 0(5)            | 5(5)            | 0(5)            |
| C4   | 27(7)           | 17(6)           | 12(6)           | −1(5)           | 0(5)            | 1(5)            |
| C5   | 20(6)           | 18(6)           | 11(6)           | 3(5)            | 1(5)            | 4(5)            |
| C6   | 22(6)           | 17(6)           | 13(6)           | 1(5)            | 6(5)            | −3(5)           |
| C7   | 13(6)           | 18(6)           | 4(5)            | 6(5)            | −2(4)           | 2(5)            |
| C8   | 19(6)           | 17(6)           | 10(6)           | 2(5)            | 0(5)            | −1(5)           |
| C9   | 20(6)           | 19(6)           | 4(5)            | 4(5)            | 6(5)            | 4(5)            |
| C10  | 11(6)           | 29(7)           | 14(6)           | 0(5)            | −1(5)           | 4(5)            |
| C11  | 14(6)           | 26(7)           | 11(6)           | 4(5)            | −5(5)           | 10(5)           |
| C12  | 29(7)           | 12(6)           | 4(5)            | 2(5)            | 5(5)            | 4(5)            |
| C13  | 24(7)           | 19(7)           | 18(6)           | 6(5)            | 10(5)           | 1(5)            |
| C14  | 12(6)           | 25(7)           | 15(6)           | 3(5)            | 2(5)            | 13(5)           |
| C15  | 24(7)           | 16(6)           | 17(7)           | 0(5)            | 6(6)            | −1(5)           |
| C16  | 52(11)          | 47(11)          | 56(11)          | 2(9)            | 16(9)           | −6(9)           |

**Table S5.** Multilevel analysis of molecular complex packing as monomer.

| Nº | Node degrees | $\Omega_i$ , % | Dimensionality of net | Topological type                                                                                                |
|----|--------------|----------------|-----------------------|-----------------------------------------------------------------------------------------------------------------|
| 1  | 2-c          | 18.92          | 1D [001]              | 2C1                                                                                                             |
| 2  | 4-c          | 8.48           | 1D [001]              | (3,6)(1,2)                                                                                                      |
| 3  | 6-c          | 8.47           | 2D (010)              | (4,4)IIa                                                                                                        |
| 4  | 7-c          | 6.51           | 3D                    | svk                                                                                                             |
| 5  | 8-c          | 4.80           | 3D                    | hex                                                                                                             |
| 6  | 9-c          | 4.21           | 3D                    | 9T269                                                                                                           |
| 7  | 10-c         | 3.13           | 3D                    | bcu-x/ 14-conn; I m -3 m->P 21/c<br>(1/2a+1/2b+1/2c, 2a-2b, -c; 1/2, 0, 1/2); Bond<br>sets: 2,4,5,7,8,9:bcu-x   |
| 8  | 12-c         | 2.51           | 3D                    | bcu-x/ 14-conn; I m -3 m->P 21/c<br>(1/2a+1/2b+1/2c, 2a-2b, -c; 1/2, 0, 1/2); Bond<br>sets: 1,2,4,5,7,8,9:bcu-x |
| 9  | 14-c         | 1.44           | 3D                    | 14T161                                                                                                          |
| 10 | 16-c         | 0.86           | 3D                    | New topology                                                                                                    |

**Table S6.** Multilevel analysis of molecular complex packing as dimer.

| <b>№</b> | <b>Node degrees</b> | <b><math>\Omega_i</math>, %</b> | <b>Dimensionality of net</b> | <b>Topological type</b> |
|----------|---------------------|---------------------------------|------------------------------|-------------------------|
| 1        | 2-c                 | 22.80                           | 1D [001]                     | 2C1                     |
| 2        | 4-c                 | 9.06                            | 2D(010)                      | sql                     |
| 3        | 8-c                 | 4.54                            | 3D                           | hex                     |
| 4        | 10-c                | 4.36                            | 3D                           | bct                     |
| 5        | 12-c                | 2.25                            | 3D                           | gsp1                    |
| 6        | 14-c                | 1.54                            | 3D                           | 14T92                   |
| 7        | 18-c                | 0.46                            | 3D                           | New topology            |

## References

1. Dolomanov, O. V.; Bourhis, L.J.; Gildea, R.J.; Howard, J.A.K.; Puschmann, H. OLEX2: a complete structure solution, refinement and analysis program. *J. Appl. Crystallogr.* **2009**, *42*, 339–341, doi:10.1107/S0021889808042726.
2. Bourhis, L.J.; Dolomanov, O. V.; Gildea, R.J.; Howard, J.A.K.; Puschmann, H. The anatomy of a comprehensive constrained, restrained refinement program for the modern computing environment – Olex2 dissected. *Acta Crystallogr. Sect. A Found. Adv.* **2015**, *71*, 59–75, doi:10.1107/S2053273314022207.
3. Blatov, V.A.; Shevchenko, A.P.; Proserpio, D.M. Applied Topological Analysis of Crystal Structures with the Program Package ToposPro. *Cryst. Growth Des.* **2014**, *14*, 3576–3586, doi:10.1021/cg500498k.
4. O’Keeffe, M.; Peskov, M.A.; Ramsden, S.J.; Yaghi, O.M. The Reticular Chemistry Structure Resource (RCSR) Database of, and Symbols for, Crystal Nets. *Acc. Chem. Res.* **2008**, *41*, 1782–1789, doi:10.1021/ar800124u.
5. Alexandrov, E. V.; Blatov, V.A.; Kochetkov, A. V.; Proserpio, D.M. Underlying nets in three-periodic coordination polymers: topology, taxonomy and prediction from a computer-aided analysis of the Cambridge Structural Database. *CrystEngComm* **2011**, *13*, 3947, doi:10.1039/c0ce00636j.
6. Shevchenko, A.P.; Blatov, V.A. Simplify to understand: how to elucidate crystal structures? *Struct. Chem.* **2021**, *32*, 507–519, doi:10.1007/s11224-020-01724-4.
7. Alexandrov, E. V.; Shevchenko, A.P.; Blatov, V.A. Topological Databases: Why Do We Need Them for Design of Coordination Polymers? *Cryst. Growth Des.* **2019**, *19*, 2604–2614, doi:10.1021/acs.cgd.8b01721.
8. Spackman, M.A.; Jayatilaka, D. Hirshfeld surface analysis. *CrystEngComm* **2009**, *11*, 19–32, doi:10.1039/B818330A.
9. Spackman, M.A.; McKinnon, J.J. Fingerprinting intermolecular interactions in molecular crystals. *CrystEngComm* **2002**, *4*, 378–392, doi:10.1039/B203191B.
10. McKinnon, J.J.; Spackman, M.A.; Mitchell, A.S. Novel tools for visualizing and exploring intermolecular interactions in molecular crystals. *Acta Crystallogr. Sect. B Struct. Sci.* **2004**, *60*, 627–668, doi:10.1107/S0108768104020300.
11. McKinnon, J.J.; Jayatilaka, D.; Spackman, M.A. Towards quantitative analysis of intermolecular interactions with Hirshfeld surfaces. *Chem. Commun.* **2007**, 3814–3816, doi:10.1039/b704980c.
